# Supplementary material for: Patch reefs as sources of long and continuous skeletal records of horizontal reef expansion in Dongsha Atoll, South China Sea
Source: Frontiers journal article supplement (doi:10.3389/fmars.2022.994966), 2022-10-27
Supplement: Table_1.XLSX [file Table_1.XLSX]

## Sheet: Table. 1
Sampling sites	Type of patch reef	Diameter (m)	location of Core on the reef	Distance to the center of reef (m)	Depth of the top of the reef (m)	Depth within the cores (m)	Age (yr ago)	2σ	Coral genus	Type of drill	Latitude	Longitude
F1	Flat-top	100	Center	0	1	1	145	± 1.8	Porites	Hydraulic	20.66497°	116.87560°
F1	Flat-top	100	Periphery	50	1	1	201	± 1.1	Porites	Hydraulic	20.66535°	116.87565°
F2	Flat-top	70	Center	0	1	1	80	± 0.8	Porites	Hydraulic	20.67630°	116.88438°
F2	Flat-top	70	Periphery	35	1	1	151	± 1.2	Porites	Hydraulic	20.67645°	116.88458°
F3	Flat-top	50	Center	0	1	1	100	± 0.84	Porites	Hydraulic	20.65895°	116.87765°
F3	Flat-top	50	Periphery	25	1	1	103	± 1.2	Porites	Hydraulic	20.65910°	116.87735°
F4	Flat-top	30	Center	0	1	1	168	± 1.6	Porites	Hydraulic	20.65990°	116.87587°
F4	Flat-top	30	Periphery	15	1	1	178	± 2.5	Porites	Hydraulic	20.65993°	116.87573°
F5	Flat-top	80	Center	0	1	1	104	± 0.70	Favia	Hydraulic	20.67393°	116.88460°
F5	Flat-top	80	Periphery	40	1	1	23	± 0.53	Porites	Hydraulic	20.67383°	116.88427°
F6	Flat-top	30	Center	0	5	5	1,871	± 4.6	Favia	Hydraulic	20.62975°	116.79827°
F6	Flat-top	30	Periphery	15	5	5	407	± 2.1	Porites	Hydraulic	20.62977°	116.79805°
F7	Flat-top	30	Center	0	5	5	1,758	± 6.2	Favia	Hydraulic	20.63285°	116.80307°
F7	Flat-top	30	Periphery	15	5	5	512	± 2.7	Porites	Hydraulic	20.63297°	116.80325°
F8	Flat-top	50	Center	0	5	5	347	± 2.1	Porites	Hydraulic	20.67067°	116.78945°
F8	Flat-top	50	Periphery	25	5	5	378	± 1.7	Porites	Hydraulic	20.67082°	116.78958°
F9	Flat-top	100	Center	0	5	5	939	± 3.6	Porites	Hydraulic	20.66943°	116.77983°
F9	Flat-top	100	Periphery	50	5	5	268	± 1.5	Porites	Hydraulic	20.66955°	116.78018°
F10	Flat-top	80	Center	0	5	5	379	± 2.2	Porites	Hydraulic	20.68388°	116.82148°
F10	Flat-top	80	Periphery	40	5	5	54	± 1.1	Porites	Hydraulic	20.68412°	116.82183°
F11	Flat-top	80	Center	0	1	1	127	± 0.8	Favia	Hydraulic	20.65313°	116.86323°
F11	Flat-top	80		4	1	1	57	± 1.5	Favia	Hydraulic	20.65317°	116.86318°
F11	Flat-top	80		8	1	1	60	± 0.8	Porites	Hydraulic	20.65317°	116.86313°
F11	Flat-top	80		12	1	1	42	± 0.8	Porites	Hydraulic	20.65317°	116.86310°
F11	Flat-top	80		24	1	1	241	± 1.5	Porites	Hydraulic	20.65318°	116.86298°
F11	Flat-top	80		28	1	1	319	± 1.3	Porites	Hydraulic	20.65320°	116.86295°
F11	Flat-top	80	Periphery	34	1	1	81	± 1.4	Porites	Hydraulic	20.65323°	116.86290°
F12	Flat-top	100	Center	0	5	5	3,412	± 15.1	Porites	Hydraulic	20.63732°	116.79842°
F12	Flat-top	100		8	5	5	3,489	± 16.6	Porites	Hydraulic	20.63737°	116.79835°
F12	Flat-top	100		16	5	5	2,260	± 9.5	Porites	Hydraulic	20.63742°	116.79830°
F12	Flat-top	100		24	5	5	2,019	± 7.6	Porites	Hydraulic	20.63748°	116.79827°
F12	Flat-top	100		32	5	5	2,188	± 8.2	Porites	Hydraulic	20.63755°	116.79822°
F12	Flat-top	100		40	5	5	1,252	± 6.6	Porites	Hydraulic	20.63760°	116.79818°
F12	Flat-top	100		48	5	5	271	± 2.6	Porites	Hydraulic	20.63768°	116.79817°
F12	Flat-top	100		1	5	5	3,542	± 10.7	Porites	Electric	20.63732°	116.79840°
F12	Flat-top	100		2	5	5	3,545	± 15.1	Porites	Electric	20.63733°	116.79840°
F12	Flat-top	100		4	5	5	3,469	± 11.4	Porites	Electric	20.63733°	116.79838°
F12	Flat-top	100		6	5	5	3,433	± 10.3	Porites	Electric	20.63737°	116.79837°
F12	Flat-top	100		9	5	5	3,077	± 17.2	Porites	Electric	20.63738°	116.79835°
F12	Flat-top	100		12	5	5	3,659	± 14.5	Porites	Electric	20.63740°	116.79833°
F12	Flat-top	100		14	5	5	4,256	± 18.6	Porites	Electric	20.63740°	116.79832°
F12	Flat-top	100		18	5	5	64	± 0.8	Porites	Electric	20.63743°	116.79830°
F12	Flat-top	100		21	5	5	1,839	± 13.7	Porites	Electric	20.63747°	116.79828°
F12	Flat-top	100		23	5	5	1,714	± 6.2	Porites	Electric	20.63748°	116.79828°
F12	Flat-top	100		26	5	5	66	± 1.2	Porites	Electric	20.63748°	116.79827°
F12	Flat-top	100		29	5	5	31	± 1.4	Porites	Electric	20.63752°	116.79825°
F12	Flat-top	100		30	5	5	223	± 2.6	Porites	Electric	20.63753°	116.79823°
F12	Flat-top	110		31	5	5	93	± 1.4	Porites	Electric	20.63755°	116.79822°
F12	Flat-top	100		33	5	5	2,613	± 9.7	Porites	Electric	20.63757°	116.79822°
F12	Flat-top	100		34	5	5	2,360	± 9.5	Porites	Electric	20.63758°	116.79820°
F12	Flat-top	100		38	5	5	1,642	± 6.1	Porites	Electric	20.63760°	116.79820°
F12	Flat-top	100		42	5	5	88	± 2.1	Porites	Electric	20.63762°	116.79818°
F12	Flat-top	100		45	5	5	1,023	± 4.8	Porites	Electric	20.63767°	116.79817°
F12	Flat-top	100	Periphery	50	5	5	70	± 1.7	Porites	Electric	20.63770°	116.79817°
F13	Flat-top	130	Center	0	5	5	257	± 2.1	Porites	Electric	20.67093°	116.77830°
F13	Flat-top	130	Periphery	60	5	5	799	± 11	Porites	Electric	20.67145°	116.77845°
F14	Flat-top	130	Center	0	4	4	651	± 4.8	Porites	Electric	20.63725°	116.81873°
F14	Flat-top	130	Periphery	60	4	4	383	± 3.1	Porites	Electric	20.63735°	116.81930°
F15	Flat-top	180	Center	0	1	1	158	± 2.0	Porites	Electric	20.72820°	116.88328°
F16	Flat-top	110	Center	0	2	2	89	± 1.5	Porites	Electric	20.72998°	116.86310°
F17	Flat-top	170	Center	0	2	2	230	± 1.9	Porites	Electric	20.71322°	116.84072°
F18	Flat-top	230	Center	0	3	3	2,840	± 9.3	Porites	Electric	20.70947°	116.79698°
F19	Flat-top	200	Center	0	4	4	237	± 15	Porites	Electric	20.71942°	116.78645°
F20	Flat-top	100	Center	0	5	5	409	± 5.6	Porites	Electric	20.70988°	116.76508°
F21	Flat-top	210	Center	0	3	3	148	± 8.8	Porites	Electric	20.67288°	116.84303°
F22	Flat-top	170	Center	0	4	4	1,017	± 24	Porites	Electric	20.68745°	116.82540°
F23	Flat-top	110	Center	0	5	5	144	± 1.8	Porites	Electric	20.67665°	116.75718°
F24	Flat-top	220	Center	0	5	5	817	± 4.0	Porites	Electric	20.64207°	116.77642°
P1	Pinnacle		Center	0	6	6	42	± 5.3	Porites	Electric	20.71715°	116.87878°
P2	Pinnacle		Center	0	11	11	28	± 0.7	Porites	Electric	20.71407°	116.87035°
P3	Pinnacle		Center	0	5	5	339	± 2.7	Porites	Electric	20.64648°	116.85417°
P4	Pinnacle		Center	0	13	13	40	± 0.9	Porites	Electric	20.64588°	116.85680°
P5	Pinnacle		Center	0	7	7	51	± 0.9	Porites	Electric	20.68163°	116.81880°
P6	Pinnacle		Center	0	9	9	9	± 1.7	Porites	Electric	20.67770°	116.81862°
P7	Pinnacle		Center	0	7	7	25	± 0.9	Porites	Electric	20.70043°	116.76195°
P8	Pinnacle		Center	0	14	14	88	± 6.6	Porites	Electric	20.70278°	116.76035°
P9	Pinnacle		Center	0	4	4	29	± 0.8	Porites	Electric	20.62267°	116.75650°
P10	Pinnacle		Center	0	10	10	73	± 1.3	Porites	Electric	20.62382°	116.75592°
P11	Pinnacle		Center	0	10	10	1,028	± 146.2	Porites	Electric	20.67857°	116.88230°
P12	Pinnacle		Center	0	10	10	35	± 1.5	Porites	Electric	20.67873°	116.84746°
P13	Pinnacle		Center	0	10	10	49	± 0.8	Porites	Electric	20.67543°	116.80000°
P14	Pinnacle		Center	0	10	10	147	± 2.0	Porites	Electric	20.67735°	116.76530°
K1	Pinnacle				10	10					20.67560°	116.86825°
K2	Pinnacle				10	10					20.69927°	116.84512°
K3	Pinnacle				10	10					20.68337°	116.79487°
K4	Pinnacle				10	10					20.70868°	116.77132°
K5	Pinnacle				10	10					20.65783°	116.74387°
